# Supplementary material for: Prognostic and Immune Infiltration Value of Proteasome Assembly Chaperone (PSMG) Family Genes in Lung Adenocarcinoma
Source: PubMed Central journal article supplement (PMC9812804; doi:10.7150/ijms.78590), 2023-01-01
Supplement: ijmsv20p0087s1.pdf [file ijmsv20p0087s1.pdf]

Supplementary data:

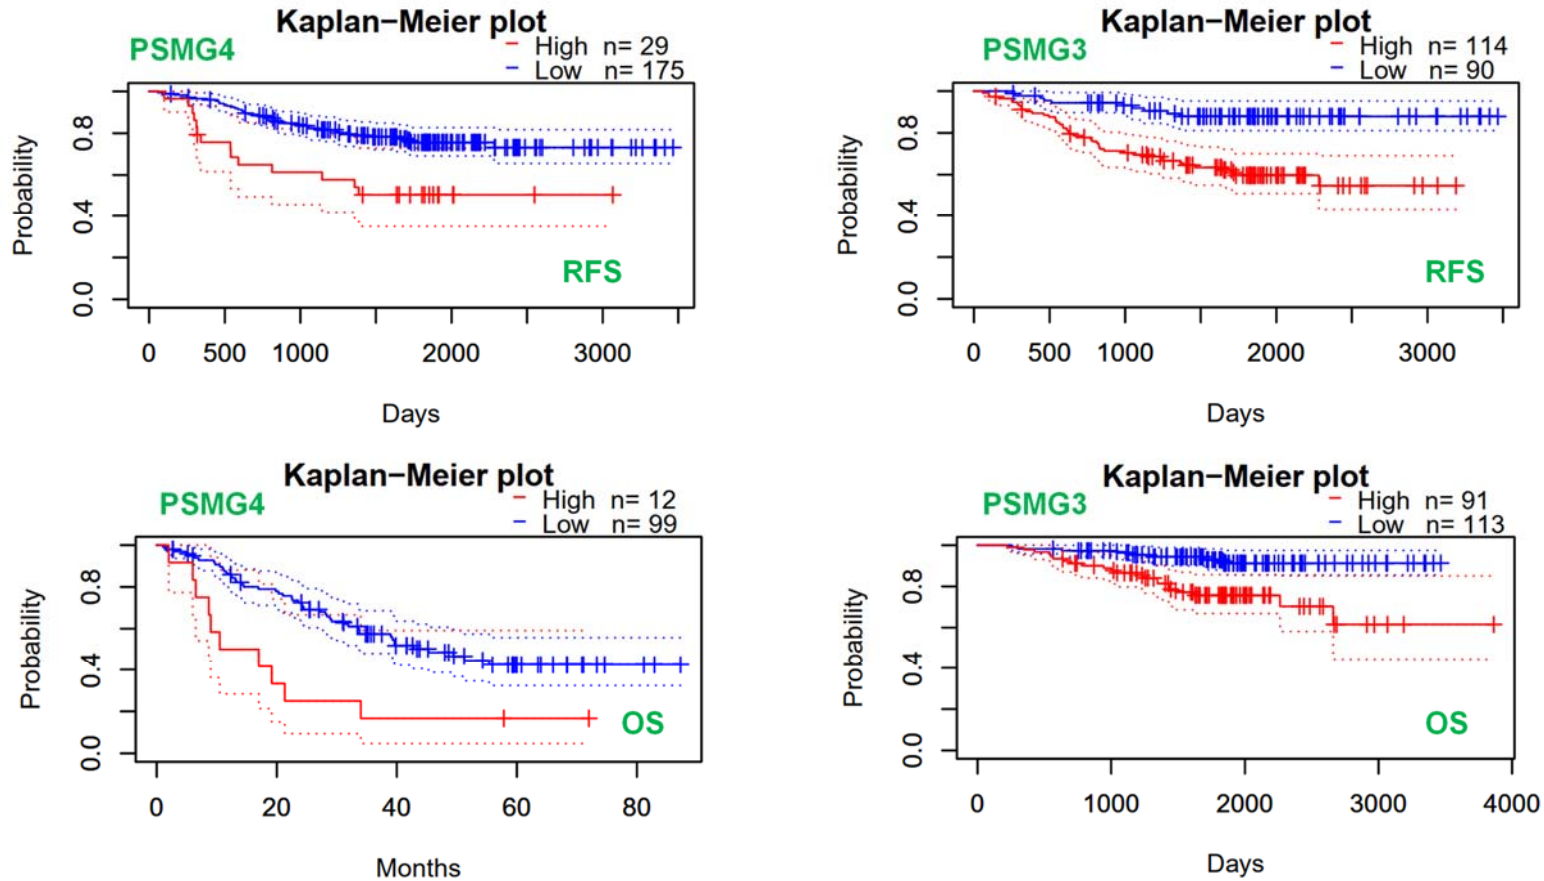

Figure S1: Predicted survival analyses according to expression level of PSMG3 and PSMG4 in LUAD patient via prognoscan database.

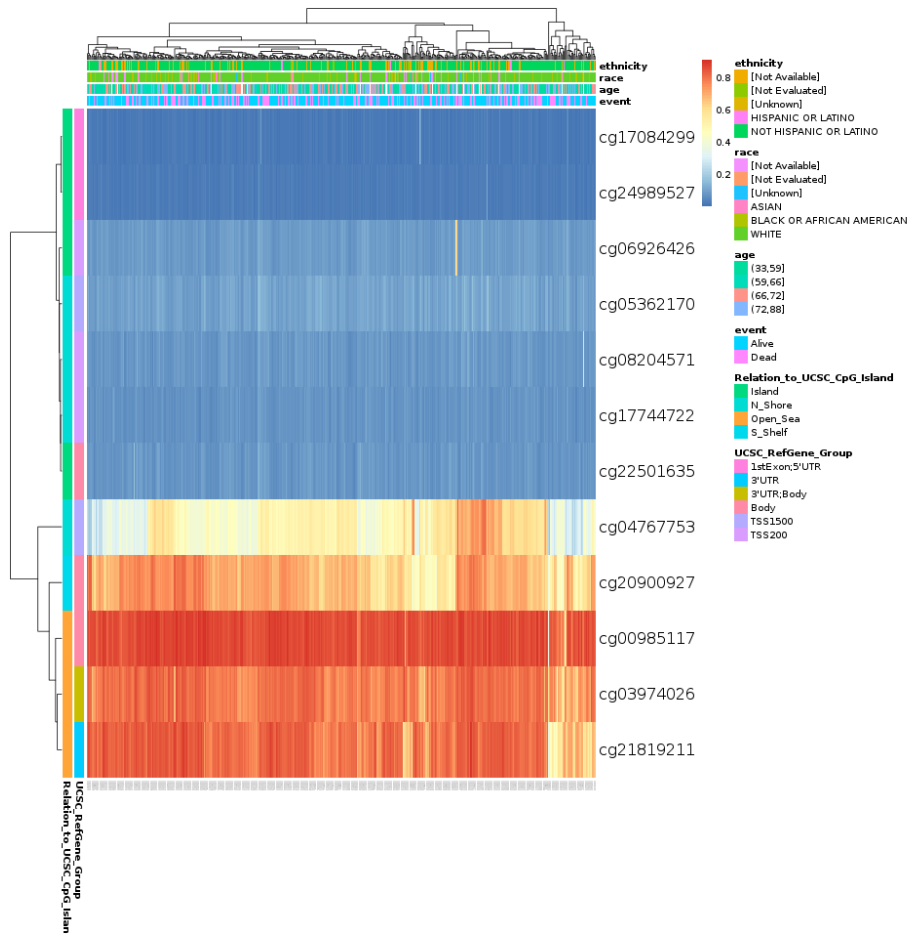

Figure S2: Heatmap of DNA methylation expression levels of the PSMG4 in lung cancer by MethSurv platform.

**Table S1: Pathway analysis of genes co-expressed with PSMG1 from public LUAD databases using the MetaCore database (with  $p < 0.01$  set as the cutoff value)**

| #  | Maps                                                                    | pValue   | Network Objects from Active Data                                                                                                                                                                                      |
|----|-------------------------------------------------------------------------|----------|-----------------------------------------------------------------------------------------------------------------------------------------------------------------------------------------------------------------------|
| 1  | Cell cycle_Role of APC in cell cycle regulation                         | 2.16E-21 | Nek2A, BUB1, MAD2b, BUB3, Tome-1, Geminin, Emi1, Cyclin A, Aurora-A, TCP1, Aurora-B, Kid, CDC20, Cyclin B, MAD2a, Securin, CDK1 (p34), CKS1                                                                           |
| 2  | Cell cycle_The metaphase checkpoint                                     | 1.52E-18 | Nek2A, BUB1, MAD2b, SPBC25, CENP-A, BUB3, DSN1, Aurora-A, Aurora-B, HP1 gamma, HEC, CDCA1, CDC20, HZwint-1, MAD2a, Survivin, CENP-H                                                                                   |
| 3  | Ubiquinone metabolism                                                   | 2.03E-18 | NDUFS5, NDUFAB1, NDUFA1, NDUFB9, NDUFB4, NDUFA8, NDUFA9, NDUFB6, NDUFB3, COQ3, NDUFB2, NDUFS8, NDUFB1, NDUFS6, coenzyme Q2 homolog, prenyltransferase (yeast), NDUFV1, NDUFS3, NDUFB10, NDUFC2, NDUFC1, DAP13, NDUFV3 |
| 4  | Cell cycle_Spindle assembly and chromosome separation                   | 1.14E-14 | Nek2A, CSE1L, RCC1, Aurora-A, Aurora-B, HEC, Kid, CDC20, Tubulin alpha, Cyclin B, MAD2a, Securin, Ran, CDK1 (p34)                                                                                                     |
| 5  | Cell cycle_Role of Nek in cell cycle regulation                         | 5.54E-12 | Nek2A, Tubulin gamma, Cyclin B1, RCC1, Aurora-A, HEC, Tubulin alpha, MAD2a, Ran, Histone H3, Histone H1, CDK1 (p34)                                                                                                   |
| 6  | DNA damage_ATM/ATR regulation of G2/M checkpoint: cytoplasmic signaling | 1.85E-10 | CDC25C, UBE2C, Cyclin B1, JAB1, Chk2, Chk1, Aurora-A, PP1-cat, Aurora-B, PP2A catalytic, Histone H3, CDK1 (p34), 14-3-3                                                                                               |
| 7  | Cell cycle_Chromosome condensation in prometaphase                      | 6.46E-10 | CAP-G, Cyclin A, CAP-G/G2, Aurora-A, Aurora-B, Cyclin B, Histone H3, Histone H1, CDK1 (p34)                                                                                                                           |
| 8  | Abnormalities in cell cycle in SCLC                                     | 8.98E-10 | CDK4, PCNA, Cyclin B1, Cyclin A, Cyclin E, Aurora-B, Histone H3, CDK1 (p34), Cyclin E2, CKS1                                                                                                                          |
| 9  | Cell cycle_Start of DNA replication in early S phase                    | 2.71E-09 | RPA3, Geminin, Cyclin E, ORC6L, ORC5L, ASK (Dbf4), PP2A catalytic, CDC7, Histone H1, CDC45L                                                                                                                           |
| 10 | GTP-XTP metabolism                                                      | 3.57E-08 | POLR2J, NDPK A, POLR2I, RRP41, RPB6, RRP46, HPRT, RPB7.0, POLR3K, POLR3F, RPB8, POLR2G, RPA16, RPA39                                                                                                                  |
| 11 | ATP/ITP metabolism                                                      | 5.12E-08 | POLR2J, NDPK A, POLR2I, RRP41, RPB6, RRP46, HPRT, RPB7.0, POLR3K, APRT, ADSL, POLR3F, RPB8, POLR2G, RPA16, RPA39                                                                                                      |
| 12 | DNA damage_ATM/ATR regulation of G2/M checkpoint: nuclear signaling     | 1.01E-07 | CDC25C, Cyclin B1, Histone H2AX, Chk2, Cyclin A, Chk1, Cyclin B, Cyclin B2, TTK, CDK1 (p34)                                                                                                                           |
| 13 | DNA damage_Double-strand break repair via homologous recombination      | 1.18E-07 | MAD2b, DSS1, Histone H2AX, PPP4C, Rad51, RAD54B, SWI5, PIR51, Histone H2A, E2N(UBC13), AUNIP, RAD51C, CDK1 (p34)                                                                                                      |
| 14 | Role of XBP1 protein in multiple myeloma                                | 2.93E-07 | SERP1, PSMA5, DNAJB11, PSMA6, PSMA7, Proteasome (20S core), ERP5                                                                                                                                                      |
| 15 | CTP/UTP metabolism                                                      | 3.3E-07  | POLR2J, CTP synthase, NDPK A, POLR2I, RRP41, RPB6, RRP46, RPB7.0, POLR3K, POLR3F, RPB8, POLR2G, RPA16, RPA39                                                                                                          |

|    |                                                                                     |          |                                                                                                        |
|----|-------------------------------------------------------------------------------------|----------|--------------------------------------------------------------------------------------------------------|
| 16 | Cell cycle_Cell cycle (generic schema)                                              | 4.3E-07  | CDC25C, CDK4, Cyclin A, Cyclin E, Cyclin B, E2F6, CDK1 (p34)                                           |
| 17 | Immune response_Antigen presentation by MHC class I, classical pathway              | 6.23E-07 | PSMB1, PSMB5, PSME2, BCAP31, TCP1, PA28 (11S regulator), Impas 1, PSMB2, PSME1, Proteasome (20S core)  |
| 18 | Cell cycle_Sister chromatid cohesion                                                | 8.69E-07 | PCNA, Cyclin B, DCC1, Securin, Histone H3, Histone H1, CDK1 (p34)                                      |
| 19 | Putative pathways of activation of monoclonal protein secretion in multiple myeloma | 1.63E-06 | SSR-delta, SERP1, DAD-1, DNAJB11, Cyclophilin B, ARMET, ERP5                                           |
| 20 | DNA damage_Intra S-phase checkpoint                                                 | 2.23E-06 | PCNA, Histone H2AX, Chk2, Cyclin A, Chk1, PP1-cat, PP1-cat alpha, ASK (Dbf4), CDC7, Histone H3, CDC45L |
| 21 | Cell cycle_Role of SCF complex in cell cycle regulation                             | 4.87E-06 | CDK4, Emi1, Cyclin E, Chk1, NEDD8, CDK1 (p34), CKS1                                                    |
| 22 | DNA damage_ATM/ATR regulation of G1/S checkpoint                                    | 9.78E-06 | CDK4, PCNA, Histone H2AX, Chk2, Cyclin A, Cyclin E, Chk1, PP2A catalytic                               |
| 23 | Cell cycle_Nucleocytoplasmic transport of CDK/Cyclins                               | 1.43E-05 | CDK4, Cyclin B1, Cyclin A, Cyclin E, CDK1 (p34)                                                        |
| 24 | CREB1-dependent transcription deregulation in Huntington's Disease                  | 3.14E-05 | Cytochrome c, COX VIIc, TFAM, NDUFS3, COX VIa-1, SOD1                                                  |
| 25 | Cell cycle_Initiation of mitosis                                                    | 3.14E-05 | CDC25C, Cyclin B1, Cyclin B2, Histone H3, Histone H1, CDK1 (p34)                                       |

**Table S2: Pathway analysis of genes co-expressed with PSMG2 from public LUAD databases using the MetaCore database (with  $p < 0.01$  set as the cutoff value)**

| # | Maps                                            | pValue   | Network Objects from Active Data                                                                                  |
|---|-------------------------------------------------|----------|-------------------------------------------------------------------------------------------------------------------|
| 1 | GTP-XTP metabolism                              | 1.72E-09 | RRP4, PM/SCL-75, NDPK A, NDPK complex, RRP43, RPB7.0, RRP40, NDPK B, RPB8, CSL4, POLR2G, PNPB, RPA16, RPA39       |
| 2 | ATP/ITP metabolism                              | 1.40E-08 | RRP4, PM/SCL-75, NDPK A, NDPK complex, RRP43, RPB7.0, RRP40, ADSL, NDPK B, RPB8, CSL4, POLR2G, PNPB, RPA16, RPA39 |
| 3 | Ubiquinone metabolism                           | 1.58E-08 | NDUFAB1, NDUFA1, NDUFB4, NDUFA8, NDUFA9, NDUFB6, NDUFB3, NDUFB5, NDUFV2, NDUFA5, NDUFS3, DAP13                    |
| 4 | Cell cycle_Role of APC in cell cycle regulation | 1.22E-07 | BUB3, Geminin, Cyclin A, Cyclin B, MAD2a, Securin, CDK1 (p34), CKS1                                               |
| 5 | CTP/UTP metabolism                              | 1.38E-07 | RRP4, PM/SCL-75, NDPK A, NDPK complex, RRP43, RPB7.0, RRP40, NDPK B, RPB8, CSL4, POLR2G, RPA16, RPA39             |

|    |                                                                                           |          |                                                                                  |
|----|-------------------------------------------------------------------------------------------|----------|----------------------------------------------------------------------------------|
| 6  | Cell cycle_Spindle assembly and chromosome separation                                     | 1.59E-07 | Ubiquitin, HEC, Tubulin alpha, Cyclin B, MAD2a, Securin, Ran, CDK1 (p34)         |
| 7  | DNA damage_ATM/ATR regulation of G2/M checkpoint: nuclear signaling                       | 2.02E-06 | CDC25C, RBBP8 (CtIP), Cyclin B1, Ku70, Cyclin A, Cyclin B, Cyclin B2, CDK1 (p34) |
| 8  | Cell cycle_The metaphase checkpoint                                                       | 4.78E-06 | BUB3, HP1 gamma, HEC, CDCA1, MAD2a, Survivin, CENP-H                             |
| 9  | Apoptosis and survival_Granzyme A signaling                                               | 1.19E-05 | NDPK A, HSP70, HMGB2, hnRNP C, Ku70, APEX, NDUFS3                                |
| 10 | LRRK2 in neuronal apoptosis in Parkinson's disease                                        | 1.32E-05 | Cytochrome c, PRDX3, Thioredoxin, ANT, Caspase-3                                 |
| 11 | Cell cycle_Role of Nek in cell cycle regulation                                           | 2.91E-05 | Cyclin B1, HEC, Tubulin alpha, MAD2a, Ran, CDK1 (p34)                            |
| 12 | DNA damage_Double-strand break repair via homologous recombination                        | 3.38E-05 | NARF, RBBP8 (CtIP), DSS1, Rad51, SWI5, Histone H2A, E2N(UBC13), SFR1, CDK1 (p34) |
| 13 | DNA damage_ATM/ATR regulation of G2/M checkpoint: cytoplasmic signaling                   | 5.18E-05 | CDC25C, MLCP (cat), Cyclin B1, PP1-cat, PP2A catalytic, CDK1 (p34), IPP-2        |
| 14 | Proteolysis_Putative ubiquitin pathway                                                    | 6.55E-05 | Ubiquitin, HSP70, UBCH6, E2N(UBC13), UBCH7                                       |
| 15 | Cell cycle_Sister chromatid cohesion                                                      | 6.55E-05 | PCNA, Cyclin B, RFC3, Securin, CDK1 (p34)                                        |
| 16 | IL-6 signaling in colorectal cancer                                                       | 6.89E-05 | Cyclin B1, HSP70, Ku70, Cyclin B, Survivin, CDK1 (p34)                           |
| 17 | Immune response_Antigen presentation by MHC class I, classical pathway                    | 7.54E-05 | PSMB1, PSMB5, PSME2, HSP70, PA28 (11S regulator), PSME1, PSMB8(LMP7)             |
| 18 | Transcription_Role of heterochromatin protein 1 (HP1) family in transcriptional silencing | 1.08E-04 | SUMO-1, Cyclin A2, HP1 gamma, MBD2, HP1, CDK1 (p34)                              |
| 19 | Cell cycle_Initiation of mitosis                                                          | 1.22E-04 | CDC25C, Cyclin B1, Cyclin B2, CDK1 (p34), CDK7                                   |
| 20 | Translation_(L)-selenoaminoacids incorporation in proteins during translation             | 1.25E-04 | SEP15, Selenoprotein K, RPL30, SelT, SEPHS1, SELS                                |
| 21 | Inhibition of remyelination in multiple sclerosis: regulation of cytoskeleton proteins    | 1.87E-04 | MLCP (cat), CDK5, Tubulin alpha, MRLC, Stathmin, Cofilin                         |

|    |                                                            |          |                                                                      |
|----|------------------------------------------------------------|----------|----------------------------------------------------------------------|
| 22 | Abnormalities in cell cycle in SCLC                        | 2.10E-04 | PCNA, Cyclin B1, Cyclin A, CDK1 (p34), CKS1                          |
| 23 | dGTP metabolism                                            | 2.25E-04 | NDPK A, POLE3 (YBL1), NDPK complex, DGUOK, NDPK B, PNPB, POLE4       |
| 24 | Immune response_BAFF-induced non-canonical NF-kB signaling | 2.48E-04 | Ubiquitin, SUMO-1, UBE1C, E2N(UBC13), NEDD8                          |
| 25 | dATP/dITP metabolism                                       | 4.62E-04 | NDPK A, POLE3 (YBL1), NDPK complex, DGUOK, ADSL, NDPK B, PNPB, POLE4 |

**Table S3: Pathway analysis of genes co-expressed with PSMG3 from public LUAD databases using the MetaCore database (with  $p < 0.01$  set as the cutoff value)**

| #  | Maps                                                                    | pValue   | Network Objects from Active Data                                                                                                                                  |
|----|-------------------------------------------------------------------------|----------|-------------------------------------------------------------------------------------------------------------------------------------------------------------------|
| 1  | Cell cycle_Role of Nek in cell cycle regulation                         | 8.06E-13 | Tubulin beta, Tubulin gamma, Cyclin B1, RCC1, MAD1 (mitotic checkpoint), Tubulin alpha, MAD2a, Ran, Histone H1, Histone H3, CDK1 (p34), Tubulin (in microtubules) |
| 2  | Cell cycle_Spindle assembly and chromosome separation                   | 1.24E-12 | RCC1, MAD1 (mitotic checkpoint), Aurora-B, Kid, CDC20, Tubulin alpha, Cyclin B, MAD2a, Securin, Ran, CDK1 (p34), Tubulin (in microtubules)                        |
| 3  | Cell cycle_Role of APC in cell cycle regulation                         | 2.27E-11 | MAD2b, Tome-1, Geminin, Aurora-B, Kid, CDC20, Cyclin B, MAD2a, Securin, CDK1 (p34), CKS1                                                                          |
| 4  | Cell cycle_The metaphase checkpoint                                     | 9.8E-11  | MAD2b, SPBC25, CENP-A, MAD1 (mitotic checkpoint), Aurora-B, HP1 gamma, CDCA1, CDC20, MAD2a, Survivin, CENP-H                                                      |
| 5  | Cell cycle_Sister chromatid cohesion                                    | 1.19E-08 | PCNA, CHTF18, Cyclin B, DCC1, Securin, Histone H1, Histone H3, CDK1 (p34)                                                                                         |
| 6  | Abnormalities in cell cycle in SCLC                                     | 9.33E-08 | CDK4, PCNA, Cyclin B1, Cyclin E, Aurora-B, Histone H3, CDK1 (p34), CKS1                                                                                           |
| 7  | DNA damage_Double-strand break repair via homologous recombination      | 1.54E-07 | MAD2b, RecQL4, WDR79, DSS1, Histone H2AX, PPP4C, Rad51, SWI5, Histone H2A, AUNIP, Histone H4, CDK1 (p34)                                                          |
| 8  | Cell cycle_Start of DNA replication in early S phase                    | 2.16E-07 | RPA3, Geminin, Cyclin E, ORC6L, ORC5L, ASK (Dbf4), Histone H1, CDC45L                                                                                             |
| 9  | DNA damage_ATM activation by DNA damage                                 | 2.19E-07 | HSP90, OBFC2B, RecQL4, HMG14, Histone H2AX, PP2A regulatory, CDK5, Suv39H1, Histone H4, BRAT1, Histone H3                                                         |
| 10 | Cell cycle_Initiation of mitosis                                        | 7.34E-07 | CDC25C, Cyclin B1, Cyclin B2, Kinase MYT1, Histone H1, Histone H3, CDK1 (p34)                                                                                     |
| 11 | DNA damage_ATM/ATR regulation of G2/M checkpoint: cytoplasmic signaling | 9.08E-07 | CDC25C, UBE2C, Cyclin B1, JAB1, PP2A regulatory, PP1-cat, Aurora-B, Histone H3, CDK1 (p34)                                                                        |
| 12 | Cell cycle_Cell cycle (generic schema)                                  | 3.21E-06 | CDC25C, CDK4, Cyclin E, Cyclin B, E2F4, CDK1 (p34)                                                                                                                |

|    |                                                                                                              |          |                                                                                                                     |
|----|--------------------------------------------------------------------------------------------------------------|----------|---------------------------------------------------------------------------------------------------------------------|
| 13 | Cytoskeleton remodeling_Keratin filaments                                                                    | 7.79E-06 | Tubulin beta, Tubulin gamma 1, Keratin 18, Actin cytoskeletal, Tubulin alpha, CDK1 (p34), Tubulin (in microtubules) |
| 14 | CTP/UTP metabolism                                                                                           | 1.37E-05 | POLR2J, NDPK A, POLR2I, RRP41, RPB6, RPB7.0, RPB8, UDP, RPA16, RPA39, NDPK D (mitochondrial)                        |
| 15 | Transcription_Role of heterochromatin protein 1 (HP1) family in transcriptional silencing                    | 1.62E-05 | Cyclin E, HP1 gamma, HP1, Suv39H1, Histone H4, Histone H3, CDK1 (p34)                                               |
| 16 | GTP-XTP metabolism                                                                                           | 1.71E-05 | POLR2J, NDPK A, POLR2I, RRP41, RPB6, RPB7.0, RPB8, RPA16, RPA39, NDPK D (mitochondrial)                             |
| 17 | Ubiquinone metabolism                                                                                        | 2.17E-05 | NDUFAB1, NDUFA1, NDUFA4, COQ3, NDUFS8, NDUFS6, coenzyme Q2 homolog, prenyltransferase (yeast), NDUFV1, DAP13        |
| 18 | Cell cycle_Role of SCF complex in cell cycle regulation                                                      | 2.44E-05 | CDK4, Cyclin E, NEDD8, CDK1 (p34), CDC34, CKS1                                                                      |
| 19 | Cytoskeleton remodeling_Regulation of actin cytoskeleton organization by the kinase effectors of Rho GTPases | 2.47E-05 | ARPC1B, Actin cytoskeletal, Rac3, Cofilin, non-muscle, F-Actin cytoskeleton, Cofilin, Rac1-related, Rac1            |
| 20 | Inhibition of remyelination in multiple sclerosis: regulation of cytoskeleton proteins                       | 3.1E-05  | Tubulin beta, Actin cytoskeletal, CDK5, Tubulin alpha, Cofilin, Rac1, Tubulin (in microtubules)                     |
| 21 | Neurophysiological process_Receptor-mediated axon growth repulsion                                           | 4.18E-05 | Ephrin-A, Actin cytoskeletal, CDK5, F-Actin cytoskeleton, Cofilin, Rac1, Tubulin (in microtubules)                  |
| 22 | ATP/ITP metabolism                                                                                           | 5.08E-05 | POLR2J, NDPK A, POLR2I, RRP41, RPB6, RPB7.0, ADSL, RPB8, RPA16, RPA39, NDPK D (mitochondrial)                       |
| 23 | Cell cycle_Chromosome condensation in prometaphase                                                           | 5.83E-05 | Aurora-B, Cyclin B, Histone H1, Histone H3, CDK1 (p34)                                                              |
| 24 | Apoptosis and survival_Regulation of apoptosis by mitochondrial proteins                                     | 7.1E-05  | Cytochrome c, GC1QBP, MTCH2, HtrA2, TIMM8A, Metaxin 1, Smac/Diablo, PP1-cat alpha, PP2C, Cofilin                    |
| 25 | Cell adhesion_Gap junctions                                                                                  | 7.42E-05 | Tubulin beta, Actin cytoskeletal, Actin, Tubulin alpha, Tubulin (in microtubules)                                   |

**Table S4: Pathway analysis of genes co-expressed with PSMG4 from public LUAD databases using the MetaCore database (with  $p < 0.01$  set as the cutoff value)**

| # | Maps                                           | pValue   | Network Objects from Active Data      |
|---|------------------------------------------------|----------|---------------------------------------|
| 1 | Statin action on the PI3K/ Akt pathway in COPD | 4.67E-04 | HSP90, p70 S6 kinase2, p70 S6 kinases |

|    |                                                                                                                             |          |                                   |
|----|-----------------------------------------------------------------------------------------------------------------------------|----------|-----------------------------------|
| 2  | DNA damage_Classical NHEJ mechanism of DSBs repair                                                                          | 6.38E-04 | PNKP, DNA polymerase lambda, PAXX |
| 3  | Folic acid metabolism                                                                                                       | 2.50E-03 | FOLC1, FOLC2, SLC19A1             |
| 4  | Possible regulation of HSF-1/ chaperone pathway in Huntington's disease                                                     | 3.52E-03 | HSP90, HSF1                       |
| 5  | Development_Negative regulation of WNT/Beta-catenin signaling in the nucleus                                                | 6.34E-03 | Nitrilase 1, KDM2, RUVBL2         |
| 6  | Histone deacetylases in Prostate Cancer                                                                                     | 6.66E-03 | HSP90, Sirtuin5                   |
| 7  | Role of osteoblasts in bone lesions formation in multiple myeloma                                                           | 9.61E-03 | Osteocalcin, TAZ                  |
| 8  | Oxidative stress_NOX and DUOX families of NADPH oxidases                                                                    | 9.61E-03 | PDIP38, NOXA1                     |
| 9  | G-protein signaling_Rac2 regulation pathway                                                                                 | 1.01E-02 | NOXA1, PREX1                      |
| 10 | The role of UV radiation in melanoma development                                                                            | 1.24E-02 | XRCC3, USF1                       |
| 11 | Development_Notch Signaling Pathway                                                                                         | 1.49E-02 | Radical fringe, GCN5              |
| 12 | Development_TNF-alpha, IL-1 alpha and WNT5A-dependent regulation of osteogenesis and adipogenesis in mesenchymal stem cells | 1.69E-02 | Osteocalcin, TAZ                  |
| 13 | Development_Fetal brown fat cell differentiation                                                                            | 2.27E-02 | p70 S6 kinase2, USF1              |
| 14 | Development_YAP/TAZ-mediated co-regulation of transcription                                                                 | 2.35E-02 | Osteocalcin, TAZ                  |
| 15 | Regulation of metabolism_Insulin regulation of glycogen metabolism                                                          | 2.43E-02 | PHK gamma, PHK gamma (liver)      |
| 16 | Signal transduction_mTORC1 downstream signaling                                                                             | 2.67E-02 | p70 S6 kinase2, p70 S6 kinases    |
| 17 | Apoptosis and survival_TNF-alpha-induced ROS-dependent Caspase-3 signaling                                                  | 2.67E-02 | NOXA1, FLAD1                      |
| 18 | DNA damage_ATM-dependent double-strand break foci                                                                           | 3.19E-02 | KDM2A, GCN5                       |
| 19 | Immune response_IL-11 signaling pathway via MEK/ERK and PI3K/AKT cascades                                                   | 3.28E-02 | Osteocalcin, p70 S6 kinases       |
| 20 | Transcription_Negative regulation of HIF1A function                                                                         | 3.46E-02 | HSP90, RUVBL2                     |
| 21 | Mechanisms of drug resistance in SCLC                                                                                       | 3.55E-02 | p70 S6 kinase2, HSF1              |
| 22 | DNA damage_ATM activation by DNA damage                                                                                     | 3.64E-02 | HSP90, MRNIP                      |
| 23 | Immune response_IL-2 signaling via ERK, PI3K, and PLC-gamma                                                                 | 3.83E-02 | p70 S6 kinase2, p70 S6 kinases    |
| 24 | DNA damage_Intra S-phase checkpoint                                                                                         | 4.12E-02 | MUS81, GCN5                       |
| 25 | Development_Negative regulation of WNT/Beta-catenin signaling in the cytoplasm                                              | 4.73E-02 | YAP1/TAZ, TAZ                     |
